# Supplementary material for: Identifications of Surfactin-Type Biosurfactants Produced by Bacillus Species Isolated from Rhizosphere of Vegetables
Source: MDPI journal article supplement (doi:10.3390/molecules28031172), 2023-01-25
Supplement: s1 [file s1]

# Identifications of surfactin-type biosurfactans produced by *Bacillus* species isolated from rhizosphere of vegetables

Attila Bartal <sup>1</sup>, Thu Huynh <sup>1,2,3</sup>, Anita Kecskeméti <sup>2</sup>, Mónika Vörös <sup>1</sup>, Orsolya Kedves <sup>1</sup>, Allaga Henrietta<sup>1</sup>, László Kredics <sup>1</sup>, Csaba Vágvolgyi <sup>1</sup> and András Szekeres <sup>1,\*</sup>

<sup>1</sup> Department of Microbiology, Faculty of Science and Informatics, University of Szeged, Közép Fásor 52, H-6726 Szeged, Hungary

<sup>2</sup> Department of Biotechnology, Faculty of Chemical Engineering, Ho Chi Minh University of Technology (HCMUT), 268 Ly Thuong Kiet Street, District 10, Ho Chi Minh City 72607, Vietnam

<sup>3</sup> Vietnam National University Ho Chi Minh City, Linh Trung Ward, Thu Duc District, Ho Chi Minh City 71351, Vietnam

\* Correspondence: szandras@bio.u-szeged.hu; Tel.: +36-62-544516

**Table S1.** Relative amounts of the detected surfactin molecules of *B. atrophaeus* (SZMC 24978), *B. cereus* (SZMC 24994), *B. pumilus* (SZMC 24987) and *B. subtilis* (SZMC 24992, SZMC 24999).

| Name         | m/z  | Rt (min) | 24978              | 24994           | 24987           | 24992          | 24999              |
|--------------|------|----------|--------------------|-----------------|-----------------|----------------|--------------------|
|              |      |          | Average peak area* |                 |                 |                |                    |
| C12-[Sur]-1  | 1016 | 21.31    | -                  | -               | -               | -              | -                  |
| C12-[AME5]-2 | 1030 | 21.57    | -                  | -               | -               | -              | -                  |
| C13-[Val7]-1 | 1016 | 22.44    | -                  | -               | -               | -              | -                  |
| C13-[Sur]-1  | 1030 | 22.58    | -                  | -               | -               | -              | 70028<br>(49.47)   |
| C12-[Sur]-2  | 1016 | 22.69    | -                  | 244674 (86.44)  | 1611151 (74.17) | -              | -                  |
| C13-[AME5]-1 | 1044 | 22.84    | -                  | -               | -               | -              | -                  |
| C13-[Sur]-2  | 1030 | 23.08    | -                  | -               | 4262 (5.82)     | -              | -                  |
| C12-[Sur]-3  | 1016 | 23.19    | -                  | -               | 510456 (82.71)  | -              | -                  |
| C13-[Val7]-2 | 1016 | 23.44    | -                  | -               | -               | -              | -                  |
| C13-[Val7]-3 | 1016 | 23.69    | -                  | -               | -               | 1969 (14.52)   | -                  |
| C13-[Val2]-2 | 1016 | 23.82    | -                  | 49473 (97.86)   | -               | -              | -                  |
| C14-[Sur]-1  | 1044 | 23.85    | -                  | -               | -               | -              | -                  |
| C13-[Sur]-3  | 1030 | 23.96    | -                  | 1464396 (75.95) | 1655488 (71.68) | 83341 (107.81) | -                  |
| C12-[Sur]-4  | 1016 | 24.07    | -                  | -               | 52132 (74.74)   | -              | -                  |
| C13-[AME5]-4 | 1044 | 24.10    | -                  | 1207773 (89.24) | -               | -              | -                  |
| C14-[AME5]-1 | 1058 | 24.11    | -                  | -               | -               | -              | -                  |
| C13-[Val7]-4 | 1016 | 24.20    | -                  | 44856 (110.36)  | -               | 3945 (70.05)   | -                  |
| C13-[Sur]-4  | 1030 | 24.21    | -                  | 2098845 (79.87) | 2234097 (73.85) | 60910 (102.26) | 3284<br>(82.01)    |
| C14-[Val7]-1 | 1030 | 24.21    | -                  | 57756 (68.94)   | -               | -              | -                  |
| C13-[AME5]-5 | 1044 | 24.35    | -                  | 542422 (89.72)  | -               | -              | -                  |
| C14-[Val2]-1 | 1030 | 24.46    | -                  | 184008 (79.85)  | -               | -              | 11053<br>(31.70)   |
| C14-[Sur]-2  | 1044 | 24.48    | -                  | -               | -               | -              | 1195556<br>(17.60) |
| C12-[Sur]-5  | 1016 | 24.57    | -                  | -               | 15240 (111.19)  | -              | -                  |
| C14-[AME5]-2 | 1058 | 24.62    | -                  | -               | -               | -              | 45189<br>(82.55)   |
| C14-[Val2]-2 | 1030 | 24.84    | -                  | 105787 (125.18) | -               | -              | -                  |
| C14-[Sur]-3  | 1044 | 24.85    | -                  | 311594 (69.42)  | 106542 (124.81) | -              | 221627<br>(25.57)  |

|                |      |       |                 |                 |                 |                |                    |
|----------------|------|-------|-----------------|-----------------|-----------------|----------------|--------------------|
|                |      |       |                 |                 |                 |                |                    |
| C13-[Val7]-5   | 1016 | 24.95 | -               | 382917 (72.97)  | -               | 28179 (86.93)  | -                  |
| C14-[Val2,7]-1 | 1016 | 24.95 | -               | 181988 (96.05)  | -               | -              | -                  |
| C14-[Val7]-2   | 1030 | 24.96 | -               | -               | -               | -              | -                  |
| C14-[AME5]-3   | 1058 | 25.12 | -               | 122001 (41.41)  | -               | -              | 3379<br>(77.03)    |
| C13-[Val7]-6   | 1016 | 25.20 | -               | 161817 (119.14) | -               | 33006 (88.58)  | -                  |
| C13-[Sur]-5    | 1030 | 25.34 | -               | 193746 (78.99)  | 133001 (76.48)  | 15745 (59.16)  | -                  |
| C14-[Val2]-3   | 1030 | 25.34 | -               | 241083 (67.34)  | -               | -              | -                  |
| C14-[Val2,7]-2 | 1016 | 25.45 | -               | 32042 (87.39)   | -               | -              | -                  |
| C14-[Val7]-3   | 1030 | 25.47 | -               | -               | -               | -              | 132910<br>(14.50)  |
| C14-[Sur]-4    | 1044 | 25.48 | -               | 2916937 (78.10) | 129503 (43.92)  | 19225 (103.68) | 15238<br>(100.10)  |
| C14-[Sur]-5    | 1044 | 25.61 | 4060202 (16.37) | 1765098 (35.77) | 3135825 (80.19) | -              | -                  |
| C15-[Sur]-1    | 1058 | 25.62 | -               | -               | -               | -              | -                  |
| C14-[AME5]-4   | 1058 | 25.75 | -               | 1070542 (54.36) | -               | -              | -                  |
| C14-[Val7]-4   | 1030 | 25.84 | -               | 113135 (37.38)  | -               | -              | 20269<br>(45.70)   |
| C15-[Sur]-2    | 1058 | 25.87 | -               | -               | -               | -              | 2962203<br>(14.00) |
| C15-[AME5]-1   | 1072 | 25.89 | -               | -               | -               | -              | -                  |
| C13-[Sur]-6    | 1030 | 26.09 | -               | 34004 (75.66)   | 23710 (77.44)   | 5178 (9.67)    | -                  |
| C15-[Val2]-1   | 1044 | 26.11 | -               | -               | -               | -              | 107097<br>(16.15)  |
| C14-[Sur]-6    | 1044 | 26.23 | -               | -               | 3028048 (34.41) | 423783 (67.12) | -                  |
| C15-[Sur]-3    | 1058 | 26.25 | -               | -               | -               | -              | -                  |
| C14-[AME5]-5   | 1058 | 26.25 | -               | 1711555 (43.22) | -               | -              | -                  |
| C14-[Val7]-5   | 1030 | 26.35 | -               | 133681 (45.23)  | -               | -              | 3972<br>(137.77)   |
| C15-[AME5]-2   | 1072 | 26.39 | -               | -               | -               | -              | 155937<br>(59.52)  |
| C14-[Val2,7]-3 | 1016 | 26.46 | -               | 67538 (80.01)   | -               | -              | -                  |
| C14-[Sur]-7    | 1044 | 26.49 | -               | 3558476 (50.14) | 2415026 (42.27) | -              | 9723<br>(43.15)    |
| C15-[Sur]-4    | 1058 | 26.50 | -               | -               | -               | -              | -                  |
| C13-[Sur]-7    | 1030 | 26.60 | -               | 96398 (75.94)   | 17969 (74.04)   | 9236 (41.41)   | -                  |
| C14-[Val7]-6   | 1030 | 26.60 | -               | 515931 (5.31)   | -               | -              | -                  |

|                    |      |       |                 |                 |                 |                 |                   |
|--------------------|------|-------|-----------------|-----------------|-----------------|-----------------|-------------------|
| C14-[Sur]-8        | 1044 | 26.74 | 2315743 (33.85) | -               | 5327045 (0.91)  | 175680 (75.90)  | -                 |
| C15-[Val7]-1       | 1044 | 26.74 | -               | -               | -               | -               | -                 |
| C14-[Val7]-7       | 1030 | 26.85 | -               | 534119 (71.06)  | -               | -               | -                 |
| C15-[Val2,7]-1     | 1030 | 26.85 | -               | -               | -               | -               | 42682<br>(29.76)  |
| C15-[Sur]-5        | 1058 | 26.88 | -               | 617787 (45.51)  | -               | -               | -                 |
| C15-[AME5]-3       | 1072 | 26.90 | -               | -               | -               | -               | -                 |
| C15-[Val7]-2       | 1044 | 27.12 | -               | -               | -               | -               | 523027<br>(10.89) |
| C16-[Sur]-1        | 1072 | 27.15 | -               | -               | -               | -               | 25832<br>(89.29)  |
| C14-[Sur]-9        | 1044 | 27.24 | -               | -               | -               | 40287 (94.58)   | -                 |
| C15-[AME5]-4       | 1072 | 27.27 | -               | 434710 (89.75)  | 350114 (165.27) | -               | 7415<br>(44.91)   |
| C16-[Sur]-2        | 1072 | 27.40 | -               | -               | -               | -               | -                 |
| C15-[Sur]-6        | 1058 | 27.51 | 4483465 (8.02)  | 2735939 (67.98) | -               | 1491920 (61.57) | 46177<br>(17.60)  |
| C14-[AME5]-6       | 1058 | 27.51 | -               | 174272 (56.97)  | -               | -               | -                 |
| C15-[AME5]-5       | 1072 | 27.52 | 1177659 (20.74) | 1070151 (45.77) | 699622 (110.90) | 194843 (22.85)  | -                 |
| C16-[AME5]-1       | 1086 | 27.54 | -               | -               | -               | -               | -                 |
| C14-[Val7]-8       | 1030 | 27.60 | -               | 175227 (36.15)  | -               | -               | -                 |
| C16-[Sur]-3        | 1072 | 27.90 | -               | -               | -               | -               | 145048<br>(37.36) |
| C15-[AME5]-6       | 1072 | 27.90 | 138555 (4.15)   | 1226541 (22.72) | 622892 (118.96) | 410096 (25.75)  | -                 |
| C16-[Leu4, AME5]-1 | 1100 | 27.93 | -               | -               | -               | -               | -                 |
| C15-[Val7]-3       | 1044 | 28.00 | -               | 239859 (69.50)  | -               | 35404 (49.43)   | -                 |
| C14-[AME5]-7       | 1058 | 28.01 | -               | 160587 (47.54)  | -               | -               | -                 |
| C14-[Val7]-9       | 1030 | 28.11 | -               | 206471 (48.82)  | -               | -               | -                 |
| C15-[Val2]-2       | 1044 | 28.12 | -               | -               | -               | -               | 17997<br>(27.00)  |
| C15-[Sur]-7        | 1058 | 28.14 | 3907059 (13.92) | 2926184 (50.96) | 4017466 (73.73) | 729624 (90.22)  | -                 |
| C16-[AME5]-2       | 1086 | 28.17 | -               | -               | -               | -               | -                 |
| C15-[Val7]-4       | 1044 | 28.25 | -               | 460252 (71.46)  | -               | 78860 (73.94)   | -                 |
| C16-[Sur]-4        | 1072 | 28.40 | -               | 460030 (34.15)  | 43142 (128.76)  | 4367 (114.76)   | 6797<br>(123.19)  |
| C14-[Sur]-10       | 1044 | 28.50 | 1365548 (54.07) | 842750 (71.07)  | 282128 (100.70) | 36064 (91.07)   | -                 |

|               |      |       |                 |                |                 |                 |               |
|---------------|------|-------|-----------------|----------------|-----------------|-----------------|---------------|
| C15-[Sur]-8   | 1058 | 28.51 | -               | -              | 2730548 (73.99) | -               | 43170 (41.30) |
| C16-[AME5]-3  | 1086 | 28.54 | -               | -              | -               | -               | -             |
| C15-[Val7]-5  | 1044 | 28.87 | -               | 814811 (83.01) | -               | 608155 (76.90)  | -             |
| C15-[AME5]-7  | 1072 | 28.91 | 59171 (27.49)   | 116653 (27.73) | 190820 (3.89)   | 51788 (35.05)   | -             |
| C17-[Sur]-1   | 1086 | 29.05 | -               | -              | -               | -               | -             |
| C16-[Val7]-2  | 1058 | 29.14 | -               | -              | -               | -               | -             |
| C16-[AME5]-4  | 1086 | 29.17 | -               | 407082 (66.92) | -               | 178815 (153.28) | -             |
| C14-[Sur]-11  | 1044 | 29.25 | -               | 320740 (54.07) | 588269 (86.33)  | 15749 (68.18)   | -             |
| C16-[Sur]-6   | 1072 | 29.28 | -               | 413457 (28.79) | 158559 (86.72)  | 108948 (23.07)  | -             |
| C17-[AME5]-1  | 1100 | 29.44 | -               | -              | -               | -               | -             |
| C15-[Val7]-6  | 1044 | 29.50 | -               | 254964 (37.97) | -               | 163381 (75.50)  | -             |
| C16-[Val7]-3  | 1058 | 29.52 | -               | -              | -               | -               | -             |
| C16-[AME5]-5  | 1086 | 29.55 | -               | -              | -               | 61212 (56.54)   | -             |
| C17-[Sur]-2   | 1086 | 29.67 | -               | -              | -               | -               | -             |
| C16-[AME5]-6  | 1086 | 29.80 | -               | 452008 (25.11) | -               | 47316 (127.83)  | -             |
| C17-[AME5]-2  | 1100 | 29.81 | -               | -              | -               | -               | -             |
| C15-[Val7]-7  | 1044 | 30.13 | -               | 195075 (59.77) | -               | 52265 (76.18)   | -             |
| C16-[AME5]-7  | 1086 | 30.18 | -               | 208984 (64.91) | -               | -               | -             |
| C15-[Val7]-8  | 1044 | 30.38 | -               | 173314 (80.85) | -               | 31070 (86.77)   | -             |
| C15-[Sur]-12  | 1058 | 30.40 | 1614266 (25.34) | 515349 (75.30) | -               | 71447 (69.81)   | -             |
| C16-[AME5]-8  | 1086 | 30.43 | -               | 160957 (52.28) | -               | 20902 (126.51)  | -             |
| C17-[Sur]-4   | 1086 | 30.55 | -               | 115161 (77.46) | -               | -               | -             |
| C15-[Val7]-9  | 1044 | 30.63 | -               | -              | -               | -               | -             |
| C17-[Sur]-5   | 1086 | 30.80 | -               | 89241 (71.90)  | -               | -               | -             |
| C17-[AME5]-4  | 1100 | 30.82 | -               | 100531 (68.42) | -               | -               | -             |
| C16-[AME5]-9  | 1086 | 30.93 | -               | 153815 (24.48) | -               | -               | -             |
| C17-[Sur]-6   | 1086 | 31.06 | -               | 94743 (110.31) | -               | -               | -             |
| C16-[AME5]-10 | 1086 | 31.31 | -               | 137260 (8.08)  | -               | -               | -             |
| C17-[Sur]-7   | 1086 | 31.43 | -               | 148530 (57.98) | -               | -               | -             |

|                    |      |       |               |                 |                |                |   |
|--------------------|------|-------|---------------|-----------------|----------------|----------------|---|
|                    |      |       |               |                 |                |                |   |
| C17-[AME5]-5       | 1100 | 31.57 | -             | 176017 (34.75)  | -              | -              | - |
| C16-[AME5]-11      | 1086 | 31.68 | -             | 96553 (86.02)   | -              | -              | - |
| C17-[Sur]-8        | 1086 | 31.94 | -             | 78485 (8.45)    | -              | -              | - |
| C17-[AME5]-6       | 1100 | 31.95 | -             | 113243 (60.29)  | -              | -              | - |
| C16-[AME5]-12      | 1086 | 32.06 | -             | 50737 (46.18)   | -              | -              | - |
| C17-[AME5]-7       | 1100 | 32.20 | -             | 35041 (57.59)   | -              | -              | - |
| C17-[Sur]-9        | 1086 | 32.31 | -             | 113350 (31.72)  | -              | -              | - |
| C16-[AME5]-13      | 1086 | 32.56 | -             | 122488 (53.02)  | -              | -              | - |
| C17-[AME5]-8       | 1100 | 32.58 | -             | 51107 (80.20)   | -              | -              | - |
| C16-[AME5]-14      | 1086 | 32.94 | -             | 73416 (8.97)    | -              | -              | - |
| C17-[Sur]-10       | 1086 | 33.07 | -             | 379520 (57.37)  | -              | -              | - |
| C16-[AME5, Val7]-1 | 1072 | 28.65 | -             | -               | -              | -              | - |
| C16-[Sur]-5        | 1072 | 28.90 | -             | 523017 (32.52)  | 225423 (59.63) | 71311 (62.75)  | - |
| C15-[Sur]-9        | 1058 | 29.14 | -             | 947400 (35.78)  | -              | 139273 (65.37) | - |
| C16-[Sur]-7        | 1072 | 29.41 | -             | 349260 (13.62)  | 117412 (82.49) | 72252 (77.08)  | - |
| C15-[AME5]-8       | 1072 | 29.41 | 12004 (47.05) | 184535 (24.24)  | 75539 (19.29)  | -              | - |
| C15-[Sur]-10       | 1058 | 29.52 | -             | -               | -              | 68277 (3.73)   | - |
| C16-[Sur]-8        | 1072 | 29.78 | -             | 924021 (83.93)  | 219479 (25.18) | 67028 (42.38)  | - |
| C15-[AME5]-9       | 1072 | 29.79 | -             | 166501 (64.48)  | 63110 (124.94) | -              | - |
| C17-[Val2,7]-1     | 1058 | 29.90 | -             | -               | -              | -              | - |
| C15-[Sur]-11       | 1058 | 30.15 | -             | 1980365 (71.22) | -              | 142447 (76.46) | - |
| C17-[Val2,7]-2     | 1058 | 30.27 | -             | -               | -              | -              | - |
| C16-[Sur]-9        | 1072 | 30.29 | -             | 400641 (99.74)  | 295975 (65.40) | 47483 (45.30)  | - |
| C15-[AME5]-10      | 1072 | 30.29 | -             | 212449 (60.57)  | -              | -              | - |
| C15-[AME5]-11      | 1072 | 30.54 | -             | 348567 (61.65)  | -              | -              | - |
| C16-[Sur]-10       | 1072 | 30.66 | -             | 323834 (49.51)  | 91983 (19.35)  | 18054 (57.77)  | - |
| C15-[Sur]-13       | 1058 | 30.77 | -             | -               | 210787 (92.01) | 40726 (94.66)  | - |
| C16-[Sur]-11       | 1072 | 30.91 | -             | 379216 (56.57)  | 129776 (59.69) | 5131 (21.74)   | - |
| C16-[Sur]-12       | 1072 | 31.29 | -             | 466617 (74.88)  | 47508 (32.04)  | 6739 (76.42)   | - |

|              |      |       |   |                |   |               |   |
|--------------|------|-------|---|----------------|---|---------------|---|
| C15-[Sur]-14 | 1058 | 31.40 | - | -              | - | 48267 (55.18) | - |
| C16-[Sur]-13 | 1072 | 31.92 | - | 138640 (52.66) | - | -             | - |
| C16-[Sur]-14 | 1072 | 32.30 | - | 285593 (64.29) | - | -             | - |
| C16-[Sur]-15 | 1072 | 32.80 | - | 199251 (78.07) | - | -             | - |

\* RSD% are in brackets.

**Table S2.** Relative amounts of the detected surfactin molecules of *B. velezensis* strains.

| Name               | m/z  | Rt (min) | 24980               | 24981             | 24982             | 24983               | 24984              | 24985              | 24986              | 24995              |
|--------------------|------|----------|---------------------|-------------------|-------------------|---------------------|--------------------|--------------------|--------------------|--------------------|
|                    |      |          | Average peak area*  |                   |                   |                     |                    |                    |                    |                    |
| C12-[Sur]-1        | 1016 | 21.31    | 1590715<br>(118.01) | 156806<br>(63.41) | 444016<br>(43.25) | 1085450<br>(125.31) | 1790471<br>(78.95) | 57623<br>(153.74)  | 146351<br>(65.34)  | -                  |
| C12-[AME5]-1       | 1030 | 21.20    | -                   | -                 | 12455<br>(48.20)  | -                   | 62393<br>(72.96)   | 3338<br>(58.34)    | -                  | -                  |
| C12-[AME5]-2       | 1030 | 21.57    | 210231<br>(77.66)   | 140353<br>(32.14) | 112138<br>(59.84) | 259186<br>(96.12)   | 264023<br>(71.09)  | 30830<br>(65.77)   | 45735<br>(55.34)   | -                  |
| C13-[Val7]-1       | 1016 | 22.44    | -                   | -                 | 7211<br>(125.63)  | -                   | 23795<br>(81.50)   | -                  | -                  | 32589<br>(128.95)  |
| C13-[Val2]-1       | 1016 | 22.56    | -                   | 2214<br>(105.36)  | 5328<br>(94.08)   | -                   | -                  | -                  | -                  | -                  |
| C13-[Sur]-1        | 1030 | 22.58    | 2516155<br>(108.73) | 311710<br>(56.52) | 539815<br>(18.89) | 1511427<br>(123.04) | 2766554<br>(77.03) | 104372<br>(129.81) | 214155<br>(66.38)  | -                  |
| C12-[Sur]-2        | 1016 | 22.69    | -                   | -                 | -                 | -                   | -                  | -                  | -                  | 1765629<br>(54.49) |
| C13-[AME5]-1       | 1044 | 22.84    | 518681<br>(67.01)   | 326333<br>(33.47) | 232220<br>(10.97) | 594768<br>(86.40)   | 940974<br>(71.57)  | 128476<br>(36.47)  | 118896<br>(4.46)   | -                  |
| C13-[Sur]-2        | 1030 | 23.08    | -                   | -                 | 88818<br>(57.75)  | 241642<br>(141.75)  | 402243<br>(74.39)  | -                  | 8112<br>(80.51)    | -                  |
| C13-[AME5, Val7]-1 | 1030 | 23.08    | -                   | 53246<br>(3.86)   | -                 | -                   | -                  | -                  | -                  | -                  |
| C13-[AME5]-2       | 1044 | 23.35    | -                   | -                 | -                 | 69081<br>(77.49)    | 79420<br>(101.85)  | 13209<br>(132.08)  | 33664<br>(60.03)   | -                  |
| C13-[Val7]-2       | 1016 | 23.44    | 282756<br>(131.36)  | -                 | 66122<br>(60.43)  | 212141<br>(134.58)  | 397961<br>(83.90)  | 20532<br>(138.59)  | -                  | 11084<br>(52.73)   |
| C13-[Val7]-3       | 1016 | 23.69    | -                   | -                 | -                 | -                   | -                  | -                  | -                  | 185384<br>(44.66)  |
| C13-[AME5]-3       | 1044 | 23.72    | -                   | -                 | -                 | 9522<br>(75.86)     | -                  | -                  | -                  | -                  |
| C14-[Sur]-1        | 1044 | 23.85    | 120329<br>(73.09)   | 72318<br>(47.51)  | 50269<br>(67.97)  | 178708<br>(97.69)   | 273981<br>(69.74)  | 22081<br>(36.81)   | 30248<br>(63.35)   | -                  |
| C13-[Sur]-3        | 1030 | 23.96    | -                   | -                 | -                 | -                   | -                  | -                  | -                  | 5537116<br>(26.88) |
| C14-[AME5]-1       | 1058 | 24.11    | 84574<br>(83.38)    | 163882<br>(22.88) | 79009<br>(32.18)  | 244592<br>(90.88)   | 44144<br>(8.11)    | 54175<br>(79.45)   | 43048<br>(112.38)  | -                  |
| C13-[Val7]-4       | 1016 | 24.20    | -                   | -                 | -                 | -                   | -                  | -                  | -                  | 140557<br>(22.77)  |
| C13-[Sur]-4        | 1030 | 24.21    | -                   | -                 | -                 | -                   | -                  | -                  | -                  | 6454147<br>(83.28) |
| C14-[Val7]-1       | 1030 | 24.21    | 54472<br>(110.53)   | 19461<br>(121.86) | 16567<br>(81.04)  | -                   | 55613<br>(87.73)   | 3447<br>(122.95)   | -                  | 48928<br>(35.50)   |
| C13-[AME5]-5       | 1044 | 24.35    | 4000<br>(52.05)     | -                 | -                 | -                   | -                  | -                  | -                  | -                  |
| C14-[Val2]-1       | 1030 | 24.46    | -                   | -                 | -                 | 64472<br>(154.55)   | -                  | -                  | 29374<br>(100.60)  | -                  |
| C14-[Sur]-2        | 1044 | 24.48    | 2459202<br>(112.39) | 328629<br>(50.55) | 696443<br>(32.89) | 1817146<br>(130.34) | 3730982<br>(75.36) | 154418<br>(115.14) | 188080<br>(109.46) | -                  |



|                    |      |       |                     |                     |                     |                     |                    |                    |                    |                     |
|--------------------|------|-------|---------------------|---------------------|---------------------|---------------------|--------------------|--------------------|--------------------|---------------------|
| C14-[AME5]-2       | 1058 | 24.62 | 528929<br>(68.59)   | 575795<br>(17.48)   | 153305<br>(51.60)   | 699775<br>(95.87)   | 1165064<br>(32.29) | 338778<br>(77.96)  | 1013100<br>(76.97) | -                   |
| C14-[Val2]-2       | 1030 | 24.84 | -                   | -                   | -                   | 48574<br>(140.68)   | -                  | 5190<br>(55.68)    | -                  | -                   |
| C14-[Sur]-3        | 1044 | 24.85 | 3135590<br>(113.26) | 565057<br>(51.74)   | 766815<br>(19.13)   | 2204054<br>(136.84) | 4706287<br>(80.06) | 329902<br>(94.79)  | 1681822<br>(80.58) | 235956<br>(60.11)   |
| C13-[Val7]-5       | 1016 | 24.95 | -                   | -                   | -                   | -                   | -                  | -                  | -                  | 1427024<br>(87.94)  |
| C14-[Val2,7]-1     | 1016 | 24.95 | -                   | -                   | 10389<br>(52.06)    | -                   | -                  | -                  | -                  | -                   |
| C14-[Val7]-2       | 1030 | 24.96 | 29163<br>(76.35)    | 8523<br>(12.63)     | 27759<br>(29.44)    | -                   | 44594<br>(72.79)   | -                  | -                  | 55428<br>(157.56)   |
| C14-[AME5]-3       | 1058 | 25.12 | 1156831<br>(70.18)  | 837912<br>(57.93)   | 628661<br>(42.87)   | 1457570<br>(109.19) | 1921755<br>(70.15) | 907250<br>(100.34) | 1990704<br>(74.32) | -                   |
| C13-[Val7]-6       | 1016 | 25.20 | -                   | -                   | -                   | -                   | -                  | -                  | -                  | 653064<br>(21.40)   |
| C13-[Sur]-5        | 1030 | 25.34 | -                   | -                   | -                   | -                   | -                  | -                  | -                  | 622664<br>(48.26)   |
| C14-[Val2,7]-2     | 1016 | 25.45 | -                   | -                   | 4512<br>(87.68)     | -                   | -                  | 6917<br>(166.95)   | -                  | -                   |
| C14-[Val7]-3       | 1030 | 25.47 | 438194<br>(113.51)  | 40513<br>(69.73)    | 115958<br>(35.74)   | 349806<br>(140.28)  | 700496<br>(83.59)  | 130082<br>(136.62) | 110470<br>(98.10)  | 131235<br>(21.99)   |
| C14-[Sur]-4        | 1044 | 25.48 | 189248<br>(76.46)   | -                   | -                   | -                   | -                  | 91964<br>(87.17)   | 105382<br>(90.26)  | 1458018<br>(137.16) |
| C14-[AME5, Val7]-1 | 1044 | 25.48 | -                   | 97729<br>(63.70)    | -                   | 196772<br>(130.03)  | -                  | -                  | -                  | -                   |
| C14-[Sur]-5        | 1044 | 25.61 | -                   | -                   | -                   | -                   | -                  | 105183<br>(101.80) | 104740<br>(79.08)  | 6033697<br>(23.99)  |
| C15-[Sur]-1        | 1058 | 25.62 | 212982<br>(90.12)   | 225572<br>(124.62)  | 100045<br>(65.57)   | 238515<br>(125.37)  | 430871<br>(78.18)  | 287165<br>(90.11)  | 370546<br>(77.56)  | -                   |
| C14-[Val7]-4       | 1030 | 25.84 | 423288<br>(129.85)  | 122644<br>(146.62)  | 168556<br>(20.76)   | 264860<br>(153.48)  | 520643<br>(84.88)  | 199644<br>(95.72)  | 152503<br>(112.07) | 220338<br>(59.81)   |
| C15-[Sur]-2        | 1058 | 25.87 | -                   | -                   | -                   | 1541435<br>(140.12) | -                  | 967869<br>(130.09) | 1067664<br>(74.46) | -                   |
| C15-[AME5]-1       | 1072 | 25.89 | 51119<br>(40.00)    | 363436<br>(123.19)  | 68815<br>(88.89)    | 162336<br>(52.33)   | 76652<br>(17.40)   | 215281<br>(122.38) | -                  | -                   |
| C14-[Sur]-6        | 1044 | 26.23 | -                   | -                   | -                   | -                   | -                  | -                  | -                  | 7328458<br>(12.02)  |
| C15-[Sur]-3        | 1058 | 26.25 | 2681879<br>(120.54) | 1058351<br>(131.89) | 1490390<br>(118.83) | -                   | 3508858<br>(76.01) | 91019<br>(120.71)  | -                  | -                   |
| C14-[Val7]-5       | 1030 | 26.35 | -                   | -                   | -                   | 4935<br>(119.39)    | -                  | -                  | -                  | -                   |
| C15-[AME5]-2       | 1072 | 26.39 | 770722<br>(83.44)   | 1181952<br>(135.07) | 838870<br>(136.40)  | 944830<br>(100.15)  | 1443615<br>(75.00) | 1281946<br>(76.71) | 1718158<br>(73.31) | -                   |
| C15-[Sur]-4        | 1058 | 26.50 | -                   | -                   | -                   | 367408<br>(101.38)  | 352890<br>(81.80)  | -                  | -                  | 220128<br>(22.91)   |
| C13-[Sur]-7        | 1030 | 26.60 | -                   | -                   | -                   | -                   | -                  | -                  | -                  | 725329<br>(31.93)   |
| C14-[Sur]-8        | 1044 | 26.74 | 111370<br>(124.53)  | 34839<br>(114.30)   | 176136<br>(31.28)   | 99742<br>(105.37)   | 171177<br>(88.04)  | -                  | -                  | 1459297<br>(23.62)  |

|                       |      |       |                    |                    |                    |                    |                   |                    |                   |                     |
|-----------------------|------|-------|--------------------|--------------------|--------------------|--------------------|-------------------|--------------------|-------------------|---------------------|
| C15-[Val7]-1          | 1044 | 26.74 | -                  | 81627<br>(102.63)  | 147816<br>(62.85)  | -                  | 101228<br>(79.99) | 21129<br>(92.01)   | 41171<br>(28.96)  | 29173<br>(35.24)    |
| C15-[AME5,<br>Val7]-1 | 1058 | 26.75 | -                  | 306580<br>(141.13) | -                  | -                  | -                 | -                  | -                 | -                   |
| C14-[Val7]-7          | 1030 | 26.85 | -                  | -                  | -                  | -                  | -                 | -                  | -                 | 2681718<br>(5.30)   |
| C15-[Val2,7]-1        | 1030 | 26.85 | -                  | -                  | 118350<br>(39.82)  | 56736<br>(136.25)  | 36404<br>(84.74)  | -                  | -                 | -                   |
| C15-[Sur]-5           | 1058 | 26.88 | -                  | -                  | 720042<br>(24.61)  | -                  | -                 | 247433<br>(82.49)  | 353513<br>(31.17) | 1231902<br>(119.72) |
| C15-[AME5]-3          | 1072 | 26.90 | 65792<br>(60.26)   | 123513<br>(127.22) | 244469<br>(38.81)  | 139325<br>(65.40)  | -                 | -                  | -                 | -                   |
| C15-[Val7]-2          | 1044 | 27.12 | 536381<br>(107.87) | 254048<br>(108.31) | 1212248<br>(32.73) | 494356<br>(132.09) | 807630<br>(82.91) | 233648<br>(138.33) | 459604<br>(64.47) | 78593<br>(55.97)    |
| C16-[Sur]-1           | 1072 | 27.15 | -                  | -                  | 767084<br>(19.19)  | 30188<br>(2.86)    | -                 | 544891<br>(16.98)  | 576198<br>(14.80) | -                   |
| C14-[Sur]-9           | 1044 | 27.24 | -                  | -                  | 343092<br>(42.01)  | -                  | -                 | -                  | -                 | -                   |
| C15-[AME5]-4          | 1072 | 27.27 | 45902<br>(60.51)   | 74487<br>(81.15)   | 161295<br>(82.20)  | -                  | 81948<br>(78.41)  | -                  | 101379<br>(57.61) | -                   |
| C16-[Sur]-2           | 1072 | 27.40 | 269182<br>(109.17) | 706409<br>(63.84)  | -                  | 362653<br>(81.60)  | 465726<br>(67.51) | -                  | -                 | -                   |
| C15-[Sur]-6           | 1058 | 27.51 | -                  | -                  | 67023<br>(91.70)   | -                  | 97373<br>(11.02)  | 15684<br>(89.06)   | 16193<br>(11.06)  | 4865387<br>(24.85)  |
| C15-[AME5]-5          | 1072 | 27.52 | -                  | 87308<br>(41.70)   | 33465<br>(61.67)   | 54200<br>(106.56)  | 9943<br>(68.93)   | 13727<br>(73.23)   | 9495<br>(104.84)  | 390558<br>(71.67)   |
| C16-[AME5]-1          | 1086 | 27.54 | 199194<br>(61.80)  | 1700188<br>(24.07) | 1312892<br>(29.98) | 1007206<br>(98.89) | 458790<br>(98.93) | 960349<br>(34.28)  | 665793<br>(36.63) | -                   |
| C14-[Val7]-8          | 1030 | 27.60 | -                  | -                  | -                  | -                  | -                 | -                  | -                 | 265106<br>(10.19)   |
| C16-[Val7]-1          | 1058 | 27.89 | -                  | -                  | 143331<br>(41.76)  | -                  | -                 | 39450<br>(43.41)   | 54785<br>(46.94)  | -                   |
| C16-[Sur]-3           | 1072 | 27.90 | -                  | 496539<br>(7.68)   | 636959<br>(7.73)   | 331330<br>(72.23)  | 625997<br>(19.65) | 241358<br>(25.67)  | 237360<br>(14.62) | -                   |
| C15-[AME5]-6          | 1072 | 27.90 | -                  | 40520<br>(75.84)   | 37220<br>(33.18)   | 26978<br>(83.71)   | 66978<br>(86.94)  | 15556<br>(54.73)   | 21369<br>(71.44)  | 757553<br>(24.11)   |
| C16-[Leu4,<br>AME5]-1 | 1100 | 27.93 | -                  | -                  | -                  | -                  | -                 | 4143<br>(13.28)    | -                 | -                   |
| C15-[Val7]-3          | 1044 | 28.00 | -                  | -                  | -                  | -                  | 15794<br>(51.77)  | -                  | -                 | 195635<br>(4.72)    |
| C16-[Val2]-1          | 1058 | 28.01 | -                  | 179097<br>(2.40)   | -                  | -                  | -                 | -                  | -                 | -                   |
| C14-[Val7]-9          | 1030 | 28.11 | -                  | -                  | -                  | -                  | -                 | -                  | -                 | 219511<br>(34.62)   |
| C15-[Sur]-7           | 1058 | 28.14 | -                  | -                  | -                  | -                  | -                 | -                  | 16196<br>(28.00)  | 3053789<br>(22.45)  |
| C16-[AME5]-2          | 1086 | 28.17 | 36518<br>(6.22)    | 311348<br>(17.93)  | 171578<br>(15.36)  | 194818<br>(101.28) | 187653<br>(46.80) | 90978<br>(70.97)   | 71279<br>(45.53)  | -                   |
| C15-[Val7]-4          | 1044 | 28.25 | 16094<br>(80.06)   | 3642<br>(57.27)    | -                  | -                  | 10240<br>(5.06)   | -                  | -                 | 271012<br>(41.39)   |

[illegible]

[illegible]

|                |      |       |   |   |   |   |   |   |   |                    |
|----------------|------|-------|---|---|---|---|---|---|---|--------------------|
| C15-[AME5]-8   | 1072 | 29.41 | - | - | - | - | - | - | - | 258011<br>(14.86)  |
| C16-[Sur]-8    | 1072 | 29.78 | - | - | - | - | - | - | - | 395200<br>(29.25)  |
| C15-[AME5]-9   | 1072 | 29.79 | - | - | - | - | - | - | - | 60727<br>(49.24)   |
| C17-[Val2,7]-1 | 1058 | 29.90 | - | - | - | - | - | - | - | 4522<br>(43.21)    |
| C17-[Val2,7]-2 | 1058 | 30.27 | - | - | - | - | - | - | - | 2061<br>(56.88)    |
| C16-[Sur]-9    | 1072 | 30.29 | - | - | - | - | - | - | - | 391533<br>(35.23)  |
| C15-[AME5]-10  | 1072 | 30.29 | - | - | - | - | - | - | - | 58979<br>(52.42)   |
| C15-[AME5]-11  | 1072 | 30.54 | - | - | - | - | - | - | - | 56542<br>(136.34)  |
| C16-[Sur]-11   | 1072 | 30.91 | - | - | - | - | - | - | - | 311103<br>(79.74)  |
| C16-[Sur]-12   | 1072 | 31.29 | - | - | - | - | - | - | - | 160009<br>(130.24) |
| C15-[Sur]-14   | 1058 | 31.40 | - | - | - | - | - | - | - | 764079<br>(108.15) |
| C16-[Sur]-13   | 1072 | 31.92 | - | - | - | - | - | - | - | 141616<br>(93.08)  |
| C16-[Sur]-14   | 1072 | 32.30 | - | - | - | - | - | - | - | 244600<br>(119.00) |
| C16-[Sur]-15   | 1072 | 32.80 | - | - | - | - | - | - | - | 340990<br>(130.48) |

\* RSD% are in brackets.
